# Supplementary material for: Controlled drug release characteristics and enhanced antibacterial effect of graphene oxide–drug intercalated layered double hydroxide hybrid films
Source: Royal Society of Chemistry journal article supplement (doi:10.1039/c2jm35144g), 2012-01-01
Supplement: c2jm35144g.pdf [file c2jm35144g.pdf]

(Supporting Information)

**Controlled drug release characteristics and enhanced antibacterial effect of graphene oxide/drug intercalated layered double hydroxides hybrid films**

**Yi Wang,<sup>a</sup> Dun Zhang,<sup>\*a</sup> Qi Bao,<sup>a,b</sup> Jiajia Wu<sup>a,b</sup> and Yi Wan<sup>a,b</sup>**

<sup>a</sup> *National Engineering Research Center for Marine Corrosion Protection, Institute of Oceanology, Chinese Academy of Sciences, 7 Nanhai Road, Qingdao 266071, China.*

<sup>b</sup> *University of Chinese Academy of Sciences, 19(Jia) Yuquan Road, Beijing 100039, China.*

[\*] Prof. Dun Zhang

National Engineering Research Center for Marine Corrosion Protection, Institute of Oceanology, Chinese Academy of Sciences, 7 Nanhai Road, Qingdao 266071, China. Fax: +86 532 82898960; Tel: +86 532 82898960; E-mail: zhangdun@qdio.ac.cn

Table S1 The observed (wt%) and the calculated (atom%) elemental contents of NO<sub>3</sub>-LDHs, BP-LDHs, and GO.

| Sample                | Composition |       |      |       |       |       |      |       |       |       |      |       |      |       |       |       |
|-----------------------|-------------|-------|------|-------|-------|-------|------|-------|-------|-------|------|-------|------|-------|-------|-------|
|                       | Mg          |       | Al   |       | C     |       | H    |       | O     |       | N    |       | S    |       | Total |       |
|                       | wt%         | atom% | wt%  | atom% | wt%   | atom% | wt%  | atom% | wt%   | atom% | wt%  | atom% | wt%  | atom% | Total | Total |
| NO <sub>3</sub> -LDHs | 17.42       | 7.52  | 8.81 | 3.43  | 0.00  | 0.00  | 4.13 | 42.93 | 65.07 | 42.70 | 4.57 | 3.42  | 0.00 | 0.00  | 100   | 100   |
| BP-LDHs               | 9.69        | 3.62  | 5.16 | 1.74  | 32.64 | 24.68 | 4.91 | 44.10 | 37.09 | 21.05 | 5.06 | 3.28  | 5.45 | 1.53  | 100   | 100   |
| GO                    | 0.00        | 0.00  | 0.00 | 0.00  | 58.36 | 47.52 | 2.98 | 28.85 | 38.66 | 23.63 | 0.00 | 0.00  | 0.00 | 0.00  | 100   | 100   |

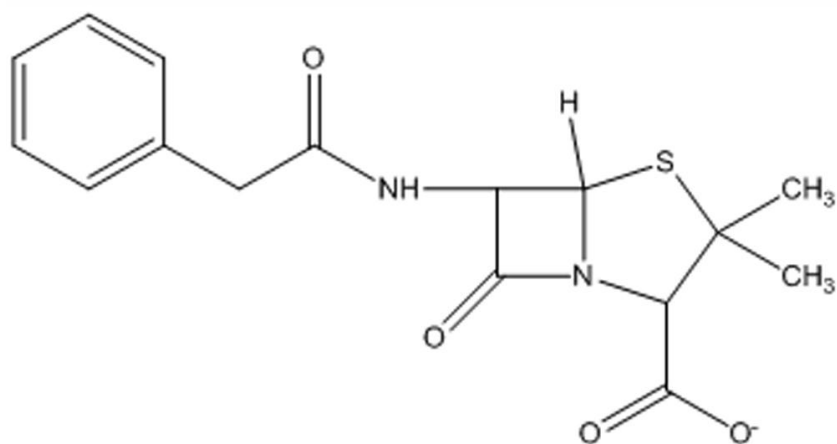

**Fig. S1** Molecular structures of the benzylpenicillin anion

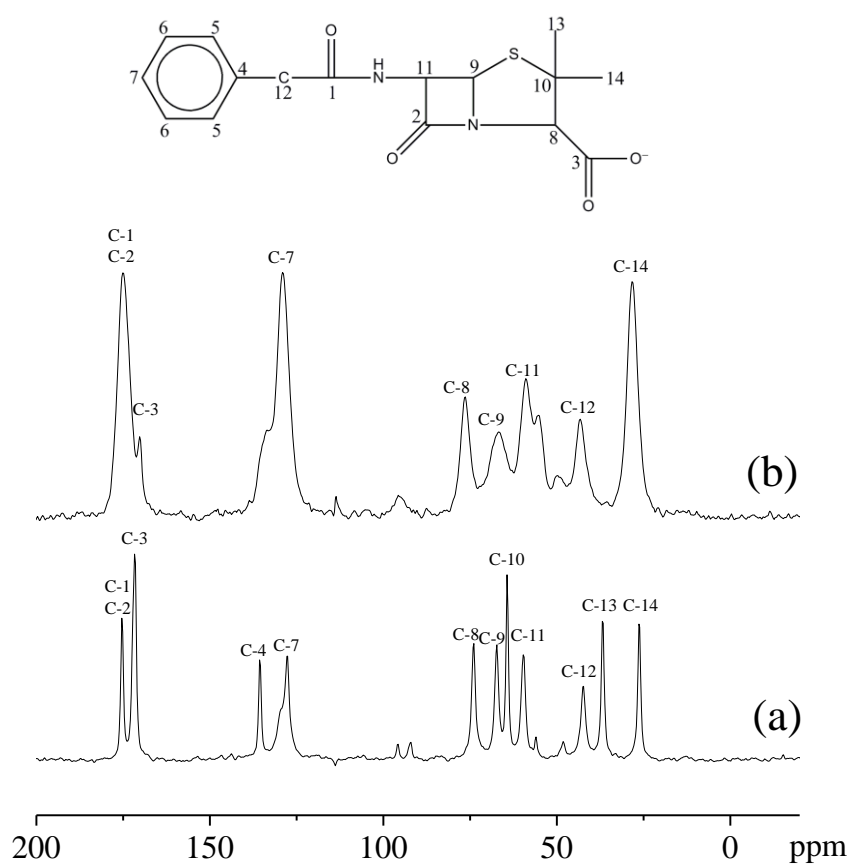

**Fig. S2** Solid state  $^{13}\text{C}$  NMR spectra of (a) pure BP and (b) BP-LDHs

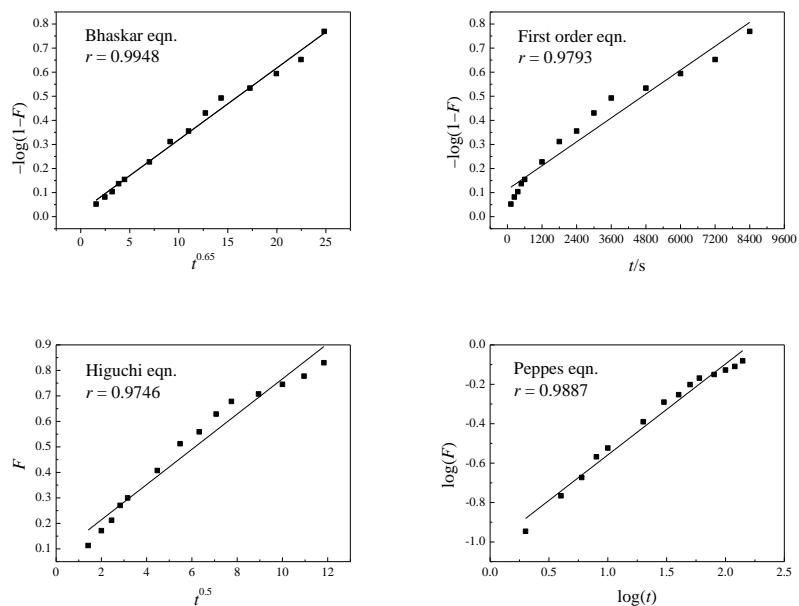

**Fig. S3** Fitted BP anion release data of powdery BP-LDHs.

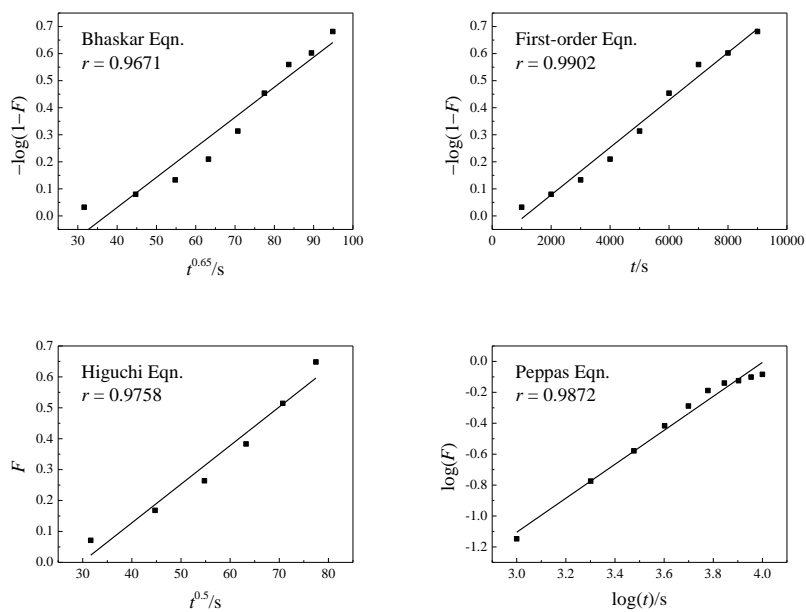

**Fig. S4** Fitted BP anion release data of GLF-2.

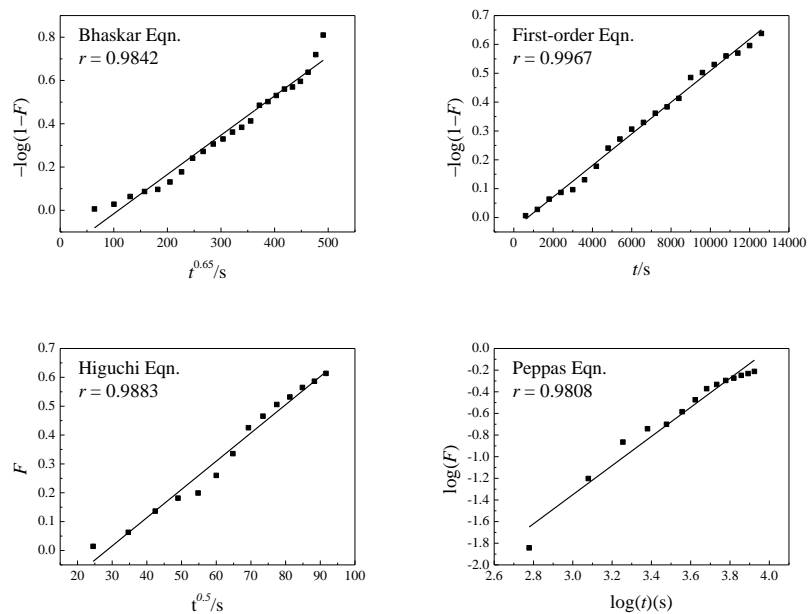

**Fig. S5** Fitted BP anion release data of GLF-3.

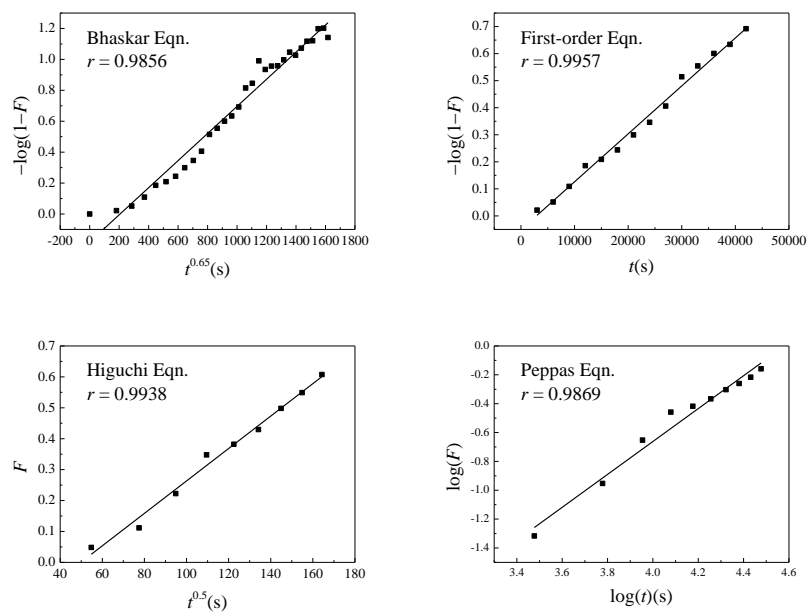

**Fig. S6** Fitted BP anion release data of GLF-4.
